# Supplementary material for: Long-Term Redistribution of Peripheral Lymphocyte Subpopulations after Switching from Calcineurin to mTOR Inhibitors in Kidney Transplant Recipients
Source: MDPI journal article supplement (doi:10.3390/jcm9041088), 2020-04-11
Supplement: s1 [file s1]

# Supplementary file

**Supplementary Table 1.** Antibodies used in the study. The table summarizes antigen, clone, fluorochrome and company for each antibody used in the study. NK-cell subsets NKG2A<sup>+</sup> and NKG2C<sup>+</sup> were identified by indirect immunofluorescence staining using a PE-conjugated F(ab')<sub>2</sub> goat anti-mouse IgG + IgM secondary antibody.

| Antigen                                           | Clone     | Fluorochrome             | Company                       |
|---------------------------------------------------|-----------|--------------------------|-------------------------------|
| CD3                                               | SK7       | FITC / APC / PerCP-Cy5.5 | BD Biosciences™               |
| CD4                                               | SK3       | APC / PerCP-Cy5.5        | BD Biosciences™               |
| CD8                                               | SK1       | PE                       | BD Biosciences™               |
| CD19                                              | SJ25C1    | PerCP-Cy5.5              | BD Biosciences™               |
| CD27                                              | L128      | FITC                     | BD Biosciences™               |
| CD38                                              | HB-7      | FITC                     | BD Biosciences™               |
| CD45                                              | 2D1       | PE / APC / PerCP-Cy5.5   | BD Biosciences™               |
| CD56                                              | NCAM 16.2 | FITC                     | BD Biosciences™               |
| IgD                                               | IA6-2     | PE                       | BD Biosciences™               |
| CD4/CD25/CD127<br>Regulatory T cell<br>kit        |           | FITC/PE-Cy7/APC          | BD Biosciences™               |
| NKG2A                                             | Z199      |                          | Provided by Dr. A.<br>Moretta |
| NKG2C                                             | MAB1381   |                          | R&D systems™                  |
| F(ab') <sub>2</sub> goat anti-<br>mouse IgG + IgM |           | PE                       | Jackson<br>ImmunoResearch™    |

### Supplementary Figure 1

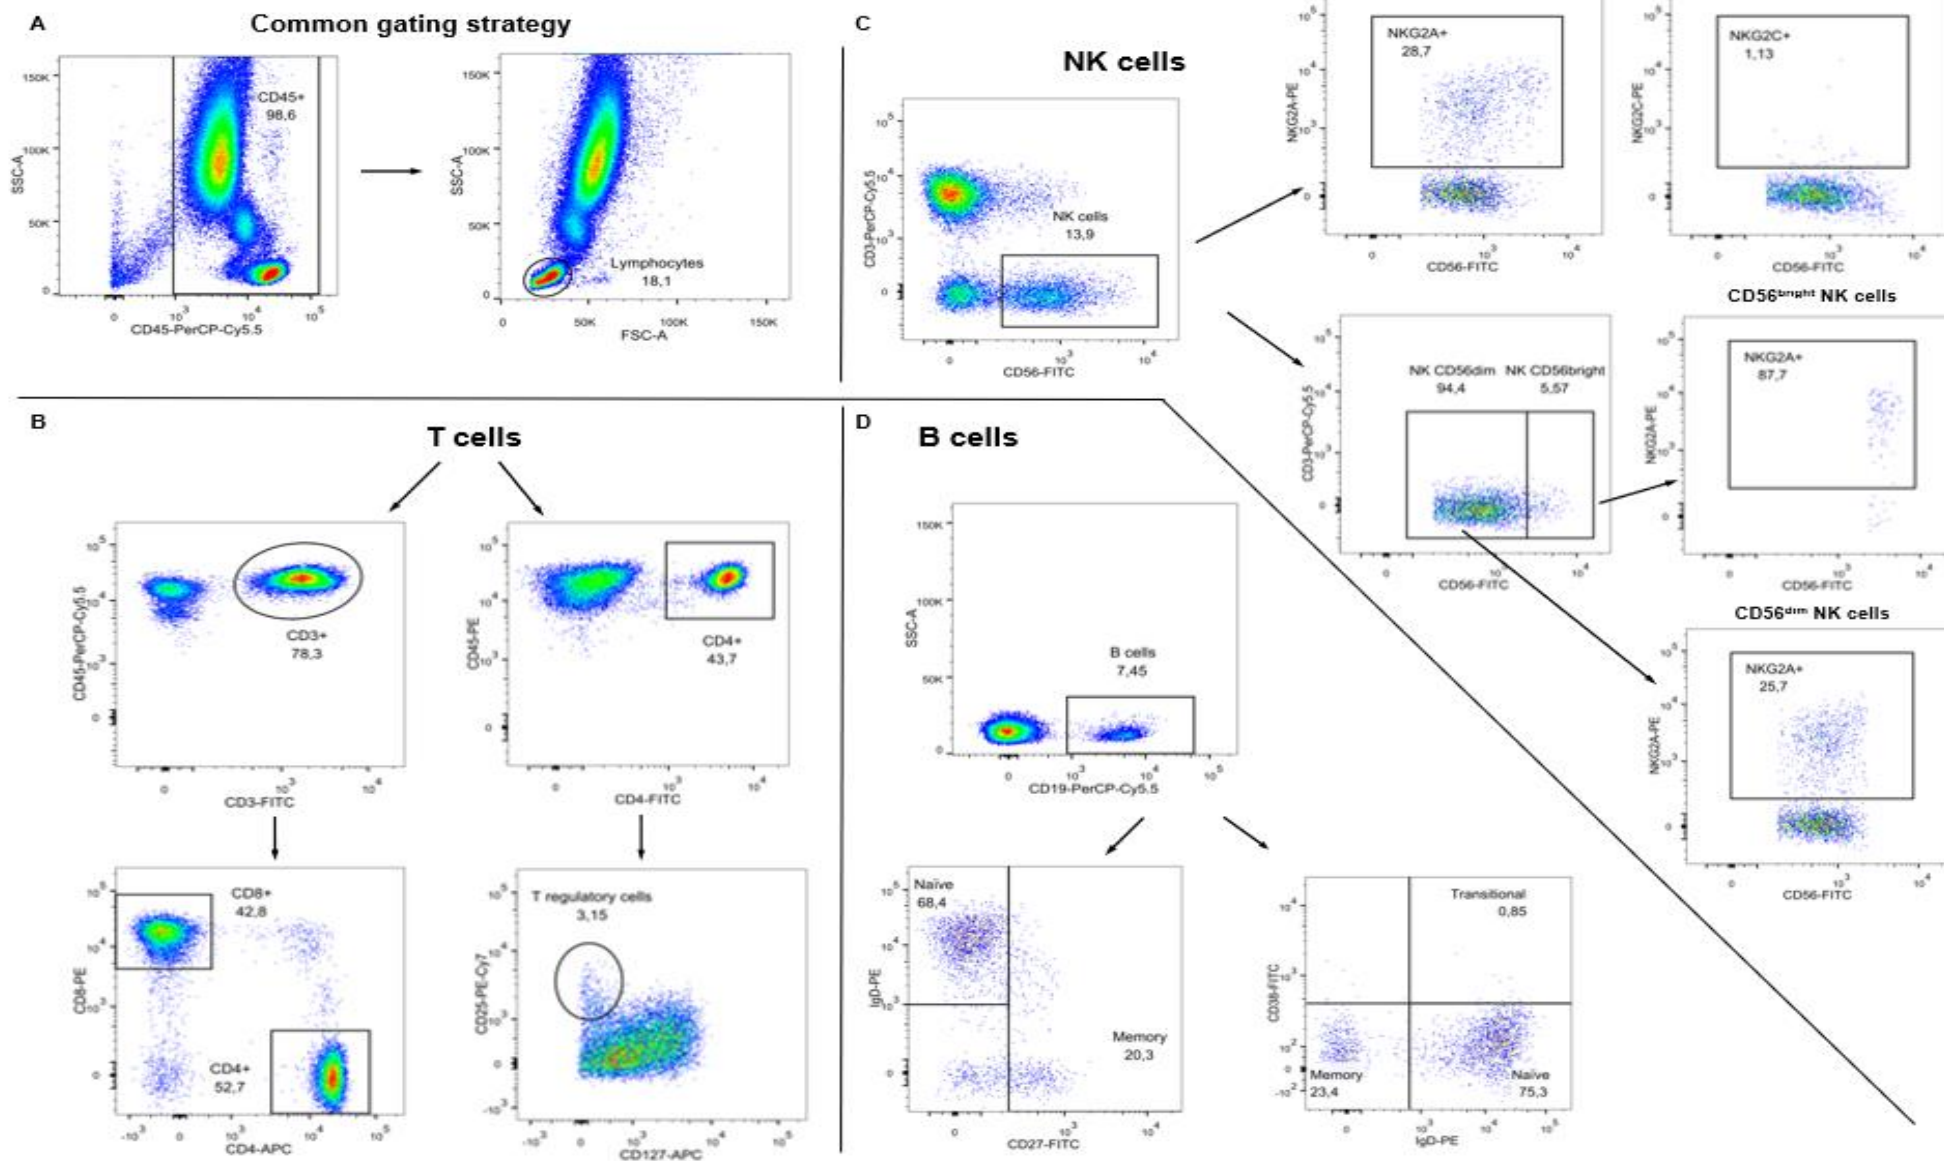

**Supplementary Figure 1.** Gating strategy for flow cytometry analysis of PBL populations. Representative flow cytometry plots from the same patient illustrate the gating strategy used for the study. (A) CD45<sup>+</sup> and lymphocyte gates were common into all analysis. (B) Gating strategy of T cells, (C) NK cells and (D) B cells.

A

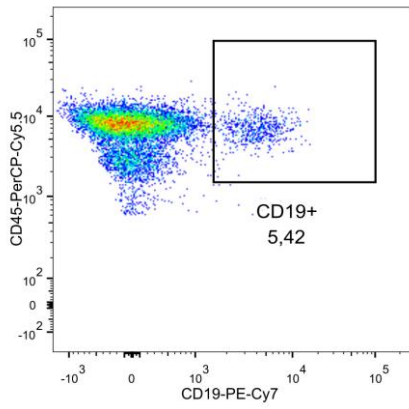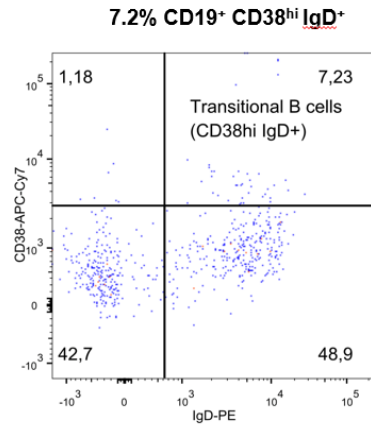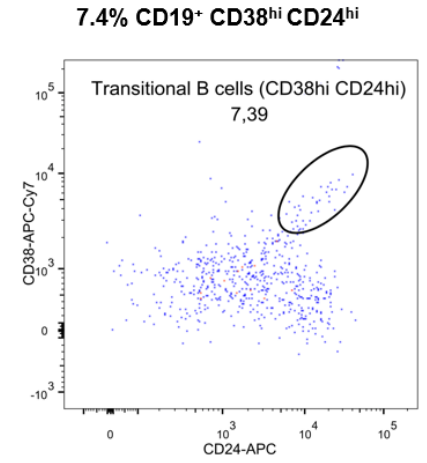

B

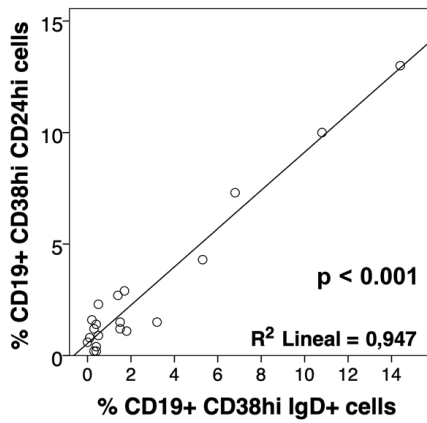

**Supplementary Figure 2.** Characterization of transitional B cells. (A) Representative flow cytometry plots from the same patient, including or not CD24 staining. (B) Correlation graph and Pearson correlation value for the CD19<sup>+</sup>CD38<sup>hi</sup>IgD<sup>+</sup> and CD19<sup>+</sup>CD24<sup>hi</sup>CD38<sup>hi</sup> populations.
